# Supplementary material for: Switch from local to global aromatic character in Möbius carbon nanobelts upon dioxidation. Evaluation of magnetic behavior in neutral and charged species
Source: Royal Society of Chemistry journal article supplement (doi:10.1039/d2cp05326h), 2023-01-01
Supplement: d2cp05326h1.pdf [file d2cp05326h1.pdf]

-- Supporting Information For --  
**Switch from Local to Global Aromatic Character  
in Möbius Carbon Nanobelts upon Dioxidation.  
Evaluation of Magnetic Behavior in Neutral and  
Charged species**

Desmond Macleod-Carey,<sup>a</sup> Alvaro Muñoz-Castro<sup>b,\*</sup>

<sup>a</sup>Laboratorio de Química Inorgánica y Materiales Moleculares, Facultad de Ingeniería, Universidad Autónoma de Chile, Llano Subercaceaux 2801, San Miguel, Santiago, Chile.

<sup>b</sup>Facultad de Ingeniería, Arquitectura y Diseño, Universidad San Sebastián, Bellavista 7, Santiago, 8420524, Chile.

**Content**

|                                                                                                                             |         |
|-----------------------------------------------------------------------------------------------------------------------------|---------|
| Table S1. NICS values at the center of each fused benzene ring. Values in ppm.                                              | Page 2. |
| Table S2. NICS values at the center of each fused benzene ring, at different levels of theory.                              | Page 3. |
| Figure S1. Calculated <sup>1</sup> H-NMR values referenced to C <sub>6</sub> H <sub>6</sub> in CDCl <sub>3</sub> (7.36 ppm) | Page 5. |
| Table S3. Calculated <sup>1</sup> H-NMR values referenced to C <sub>6</sub> H <sub>6</sub> in CDCl <sub>3</sub> (7.36 ppm)  | Page 5  |
| Table S4. Coordinates for optimized geometries. Values in Å.                                                                | Page 6. |

Table S1. NICS values at the center of each fused benzene ring. Values in ppm.

| Ring N° | 0     | 2+    |
|---------|-------|-------|
| 1       | -2.94 | -7.91 |
| 2       | -9.11 | -6.56 |
| 3       | -3.00 | 3.57  |
| 4       | -9.46 | -5.46 |
| 5       | -2.96 | -5.55 |
| 6       | -9.29 | -5.95 |
| 7       | -2.82 | 0.17  |
| 8       | -9.46 | -5.14 |
| 9       | -3.13 | -1.91 |
| 10      | -9.33 | -5.73 |
| 11      | -3.02 | -3.05 |
| 12      | -9.36 | -5.39 |
| 13      | -3.01 | 0.14  |
| 14      | -9.37 | -5.39 |
| 15      | -2.98 | -3.78 |
| 16      | -9.35 | -5.26 |
| 17      | -3.04 | 0.55  |
| 18      | -9.50 | -5.18 |
| 19      | -3.05 | -3.16 |
| 20      | -9.41 | -5.22 |
| 21      | -2.99 | -0.29 |
| 22      | -9.47 | -4.94 |
| 23      | -2.98 | -1.62 |
| 24      | -9.41 | -5.18 |
| 25      | -2.97 | -1.74 |
| 26      | -9.46 | -4.96 |
| 27      | -3.00 | -0.26 |
| 28      | -9.40 | -5.26 |
| 29      | -3.03 | -3.27 |
| 30      | -9.45 | -5.22 |
| 31      | -3.07 | 0.53  |
| 32      | -9.37 | -5.27 |
| 33      | -2.98 | -3.75 |
| 34      | -9.37 | -5.40 |
| 35      | -3.05 | 0.12  |
| 36      | -9.35 | -5.34 |
| 37      | -3.05 | -3.11 |
| 38      | -9.36 | -5.72 |
| 39      | -3.22 | -1.98 |
| 40      | -9.38 | -5.11 |
| 41      | -2.87 | 0.28  |
| 42      | -9.27 | -5.99 |
| 43      | -2.93 | -5.54 |
| 44      | -9.23 | -5.50 |

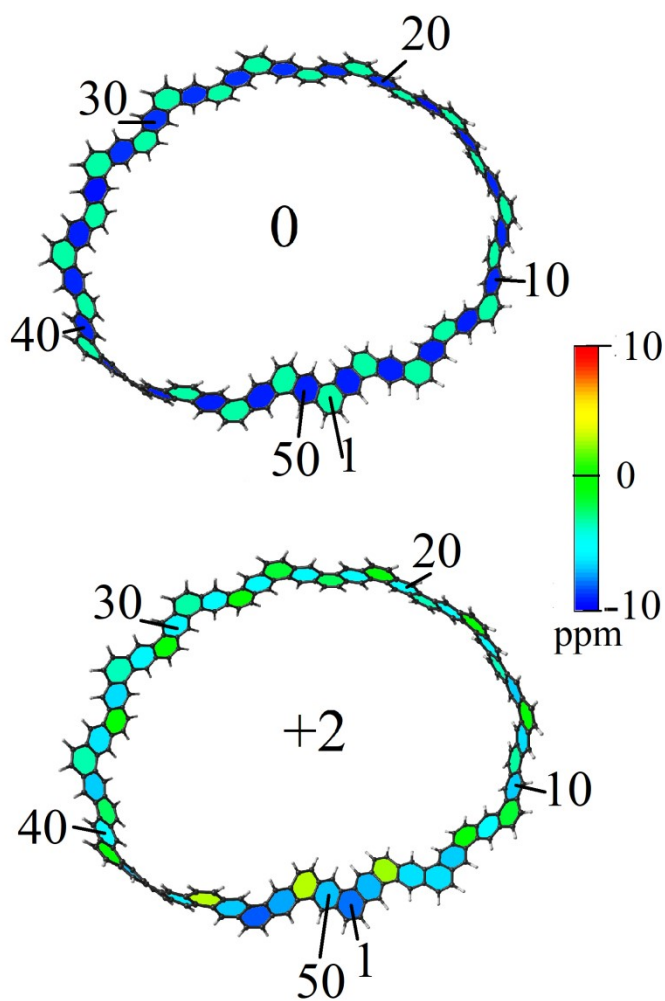

|    |       |       |
|----|-------|-------|
| 45 | -2.86 | 3.48  |
| 46 | -9.06 | -6.60 |
| 47 | -2.94 | -8.15 |
| 48 | -9.14 | -6.98 |
| 49 | -2.99 | 4.02  |
| 50 | -9.12 | -6.67 |

Table S2. NICS values at the center of each fused benzene ring, at different levels of theory involving PBE0/TZ2P, CAM-B3LYP/TZ2P and M06-2X/TZ2P. Values in ppm. Numeration given on Table S1 schematic.

| Ring N° | PBE0  |       | CAM-B3LYP |       | M06-2X |        |
|---------|-------|-------|-----------|-------|--------|--------|
|         | 0     | 2+    | 0         | 2+    | 0      | 2+     |
| 1       | -2.94 | -7.91 | -3.42     | -8.92 | -10.64 | -32.28 |
| 2       | -9.11 | -6.56 | -10.61    | -7.39 | -32.98 | -26.77 |
| 3       | -3.00 | 3.57  | -3.49     | 4.02  | -10.86 | 14.57  |
| 4       | -9.46 | -5.46 | -11.02    | -6.15 | -34.25 | -22.28 |
| 5       | -2.96 | -5.55 | -3.45     | -6.26 | -10.72 | -22.65 |
| 6       | -9.29 | -5.95 | -10.82    | -6.71 | -33.63 | -24.28 |
| 7       | -2.82 | 0.17  | -3.28     | 0.19  | -10.21 | 0.69   |
| 8       | -9.46 | -5.14 | -11.02    | -5.79 | -34.25 | -20.98 |
| 9       | -3.13 | -1.91 | -3.65     | -2.15 | -11.33 | -7.79  |
| 10      | -9.33 | -5.73 | -10.87    | -6.46 | -33.78 | -23.38 |
| 11      | -3.02 | -3.05 | -3.52     | -3.44 | -10.93 | -12.45 |
| 12      | -9.36 | -5.39 | -10.90    | -6.08 | -33.89 | -22.00 |
| 13      | -3.01 | 0.14  | -3.51     | 0.16  | -10.90 | 0.57   |
| 14      | -9.37 | -5.39 | -10.91    | -6.08 | -33.92 | -22.00 |
| 15      | -2.98 | -3.78 | -3.47     | -4.26 | -10.79 | -15.43 |
| 16      | -9.35 | -5.26 | -10.89    | -5.93 | -33.85 | -21.47 |
| 17      | -3.04 | 0.55  | -3.54     | 0.62  | -11.01 | 2.24   |
| 18      | -9.50 | -5.18 | -11.07    | -5.84 | -34.39 | -21.14 |
| 19      | -3.05 | -3.16 | -3.55     | -3.56 | -11.04 | -12.90 |
| 20      | -9.41 | -5.22 | -10.96    | -5.88 | -34.07 | -21.30 |
| 21      | -2.99 | -0.29 | -3.48     | -0.33 | -10.83 | -1.18  |
| 22      | -9.47 | -4.94 | -11.03    | -5.57 | -34.29 | -20.16 |
| 23      | -2.98 | -1.62 | -3.47     | -1.83 | -10.79 | -6.61  |
| 24      | -9.41 | -5.18 | -10.96    | -5.84 | -34.07 | -21.14 |
| 25      | -2.97 | -1.74 | -3.46     | -1.96 | -10.75 | -7.10  |
| 26      | -9.46 | -4.96 | -11.02    | -5.59 | -34.25 | -20.24 |
| 27      | -3.00 | -0.26 | -3.49     | -0.29 | -10.86 | -1.06  |
| 28      | -9.40 | -5.26 | -10.95    | -5.93 | -34.03 | -21.47 |
| 29      | -3.03 | -3.27 | -3.53     | -3.69 | -10.97 | -13.34 |
| 30      | -9.45 | -5.22 | -11.01    | -5.88 | -34.21 | -21.30 |
| 31      | -3.07 | 0.53  | -3.58     | 0.60  | -11.11 | 2.16   |
| 32      | -9.37 | -5.27 | -10.91    | -5.94 | -33.92 | -21.51 |
| 33      | -2.98 | -3.75 | -3.47     | -4.23 | -10.79 | -15.30 |

|    |       |       |        |       |        |        |
|----|-------|-------|--------|-------|--------|--------|
| 34 | -9.37 | -5.40 | -10.91 | -6.09 | -33.92 | -22.04 |
| 35 | -3.05 | 0.12  | -3.55  | 0.14  | -11.04 | 0.49   |
| 36 | -9.35 | -5.34 | -10.89 | -6.02 | -33.85 | -21.79 |
| 37 | -3.05 | -3.11 | -3.55  | -3.51 | -11.04 | -12.69 |
| 38 | -9.36 | -5.72 | -10.90 | -6.45 | -33.89 | -23.34 |
| 39 | -3.22 | -1.98 | -3.75  | -2.23 | -11.66 | -8.08  |
| 40 | -9.38 | -5.11 | -10.93 | -5.76 | -33.96 | -20.85 |
| 41 | -2.87 | 0.28  | -3.34  | 0.32  | -10.39 | 1.14   |
| 42 | -9.27 | -5.99 | -10.80 | -6.75 | -33.56 | -24.45 |
| 43 | -2.93 | -5.54 | -3.41  | -6.24 | -10.61 | -22.61 |
| 44 | -9.23 | -5.50 | -10.75 | -6.20 | -33.42 | -22.45 |
| 45 | -2.86 | 3.48  | -3.33  | 3.92  | -10.35 | 14.20  |
| 46 | -9.06 | -6.60 | -10.55 | -7.44 | -32.80 | -26.93 |
| 47 | -2.94 | -8.15 | -3.42  | -9.19 | -10.64 | -33.26 |
| 48 | -9.14 | -6.98 | -10.65 | -7.87 | -33.09 | -28.49 |
| 49 | -2.99 | 4.02  | -3.48  | 4.53  | -10.83 | 16.41  |
| 50 | -9.12 | -6.67 | -10.62 | -7.52 | -33.02 | -27.22 |

Figure S1. Calculated  $^1\text{H-NMR}$  values referenced to  $\text{C}_6\text{H}_6$  in  $\text{CDCl}_3$  (7.36 ppm).

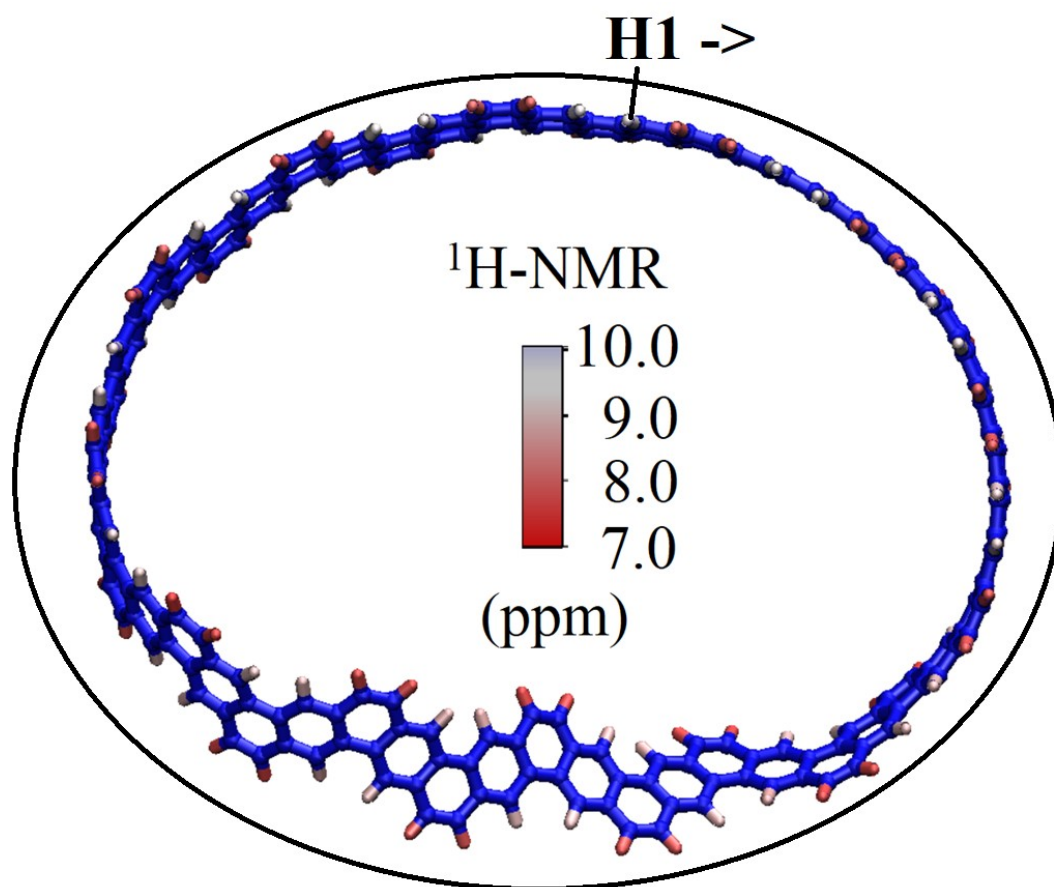

Table S3. Calculated  $^1\text{H-NMR}$  values referenced to  $\text{C}_6\text{H}_6$  in  $\text{CDCl}_3$  (7.36 ppm)

|            |     |            |     |            |     |            |     |            |     |             |     |
|------------|-----|------------|-----|------------|-----|------------|-----|------------|-----|-------------|-----|
| <b>H1</b>  | 9.3 | <b>H19</b> | 7.9 | <b>H37</b> | 8.9 | <b>H55</b> | 7.8 | <b>H73</b> | 9.1 | <b>H91</b>  | 9.2 |
| <b>H2</b>  | 8.0 | <b>H20</b> | 9.2 | <b>H38</b> | 7.7 | <b>H56</b> | 8.8 | <b>H74</b> | 7.8 | <b>H92</b>  | 7.9 |
| <b>H3</b>  | 8.0 | <b>H21</b> | 9.1 | <b>H39</b> | 8.9 | <b>H57</b> | 8.8 | <b>H75</b> | 9.0 | <b>H93</b>  | 9.3 |
| <b>H4</b>  | 9.3 | <b>H22</b> | 7.9 | <b>H40</b> | 7.7 | <b>H58</b> | 7.7 | <b>H76</b> | 7.8 | <b>H94</b>  | 7.9 |
| <b>H5</b>  | 9.2 | <b>H23</b> | 9.1 | <b>H41</b> | 8.8 | <b>H59</b> | 8.7 | <b>H77</b> | 9.1 | <b>H95</b>  | 7.9 |
| <b>H6</b>  | 7.9 | <b>H24</b> | 7.8 | <b>H42</b> | 7.7 | <b>H60</b> | 7.7 | <b>H78</b> | 7.9 | <b>H96</b>  | 9.2 |
| <b>H7</b>  | 9.3 | <b>H25</b> | 9.0 | <b>H43</b> | 7.7 | <b>H61</b> | 8.9 | <b>H79</b> | 7.8 | <b>H97</b>  | 9.3 |
| <b>H8</b>  | 7.9 | <b>H26</b> | 7.7 | <b>H44</b> | 8.8 | <b>H62</b> | 7.7 | <b>H80</b> | 9.1 | <b>H98</b>  | 8.0 |
| <b>H9</b>  | 9.2 | <b>H27</b> | 7.8 | <b>H45</b> | 8.8 | <b>H63</b> | 7.7 | <b>H81</b> | 9.2 | <b>H99</b>  | 9.3 |
| <b>H10</b> | 7.8 | <b>H28</b> | 9.1 | <b>H46</b> | 7.8 | <b>H64</b> | 9.0 | <b>H82</b> | 7.8 | <b>H100</b> | 8.0 |
| <b>H11</b> | 7.9 | <b>H29</b> | 9.1 | <b>H47</b> | 8.7 | <b>H65</b> | 8.9 | <b>H83</b> | 9.2 |             |     |
| <b>H12</b> | 9.2 | <b>H30</b> | 7.8 | <b>H48</b> | 7.8 | <b>H66</b> | 7.7 | <b>H84</b> | 7.9 |             |     |
| <b>H13</b> | 9.2 | <b>H31</b> | 9.0 | <b>H49</b> | 8.9 | <b>H67</b> | 8.9 | <b>H85</b> | 9.2 |             |     |
| <b>H14</b> | 8.0 | <b>H32</b> | 7.8 | <b>H50</b> | 7.7 | <b>H68</b> | 7.6 | <b>H86</b> | 8.0 |             |     |
| <b>H15</b> | 9.2 | <b>H33</b> | 8.9 | <b>H51</b> | 8.9 | <b>H69</b> | 9.0 | <b>H87</b> | 7.9 |             |     |
| <b>H16</b> | 7.9 | <b>H34</b> | 7.7 | <b>H52</b> | 7.7 | <b>H70</b> | 7.8 | <b>H88</b> | 9.2 |             |     |
| <b>H17</b> | 9.2 | <b>H35</b> | 7.6 | <b>H53</b> | 8.8 | <b>H71</b> | 7.8 | <b>H89</b> | 9.2 |             |     |
| <b>H18</b> | 7.8 | <b>H36</b> | 8.8 | <b>H54</b> | 7.8 | <b>H72</b> | 9.1 | <b>H90</b> | 7.8 |             |     |

Table S4. Coordinates for optimized geometries. Values in Å.

300

(25, 25)MCNB q=0

|   |               |              |               |
|---|---------------|--------------|---------------|
| C | 1.422887041   | 0.231239419  | -14.866026286 |
| C | 0.510881803   | 1.290057783  | -14.912455256 |
| C | 1.777455769   | -2.217337236 | -14.942652258 |
| C | 0.880992858   | -1.095706606 | -14.917822849 |
| C | -0.510881803  | -1.290057783 | -14.912455256 |
| C | -1.422887041  | -0.231239419 | -14.866026286 |
| C | -0.880992858  | 1.095706606  | -14.917822849 |
| C | -3.124421342  | 2.054922001  | -14.846153675 |
| C | -1.777455769  | 2.217337236  | -14.942652258 |
| C | -3.488733599  | -1.642987999 | -14.525508119 |
| C | -2.870735452  | -0.403977897 | -14.718944343 |
| C | -5.091358799  | 0.621102957  | -14.443688156 |
| C | -3.714451334  | 0.755198536  | -14.689058217 |
| C | -5.428159115  | -3.061658709 | -13.962093541 |
| C | -4.859974968  | -1.774199688 | -14.248318070 |
| C | -7.098273369  | -0.761665410 | -13.781644311 |
| C | -5.697683842  | -0.612209033 | -14.186052778 |
| C | -7.999041370  | 0.302977375  | -13.687799245 |
| C | -6.717773300  | -3.195028203 | -13.549307675 |
| C | -8.872828083  | -2.199044473 | -12.862592882 |
| C | -7.582415523  | -2.057819395 | -13.403244144 |
| C | -9.736917702  | -1.115301400 | -12.673910580 |
| C | -9.291674955  | 0.160348422  | -13.156454973 |
| C | -11.369578410 | 1.208054757  | -12.423371765 |
| C | -10.165800294 | 1.294421098  | -13.050131616 |
| C | -11.492591974 | -2.362103531 | -11.347774963 |
| C | -11.019930898 | -1.201110089 | -11.968844233 |
| C | -12.980903998 | -0.041382963 | -11.037216605 |
| C | -11.815218833 | -0.016685525 | -11.820390620 |
| C | -13.037806740 | -3.575835614 | -9.849862235  |
| C | -12.644487732 | -2.380109898 | -10.542004169 |
| C | -14.515794372 | -1.183667682 | -9.391078377  |
| C | -13.407018008 | -1.181131378 | -10.349113992 |
| C | -15.281923906 | -0.054435469 | -9.085819989  |
| C | -14.058830328 | -3.575112937 | -8.950446225  |
| C | -15.734726500 | -2.358168421 | -7.604763504  |
| C | -14.797353796 | -2.379946890 | -8.651980599  |
| C | -16.411783056 | -1.196010979 | -7.220930639  |
| C | -16.204754247 | -0.027066236 | -8.026739279  |
| C | -17.652949619 | 1.285037775  | -6.567279333  |
| C | -16.898583775 | 1.185567994  | -7.694361330  |
| C | -17.419407845 | -2.139098612 | -5.101726593  |
| C | -17.227543145 | -1.089894658 | -6.007660321  |
| C | -18.407945284 | 0.360898873  | -4.409151152  |
| C | -17.792920859 | 0.181559836  | -5.658897986  |
| C | -18.095082635 | -3.035193184 | -2.899458585  |
| C | -18.015347942 | -1.954168860 | -3.842175921  |
| C | -18.891900712 | -0.432205042 | -2.063765712  |
| C | -18.479958640 | -0.655101013 | -3.451125374  |
| C | -19.250306140 | 0.819755435  | -1.555584703  |
| C | -18.478446670 | -2.827746516 | -1.610365211  |
| C | -19.001505386 | -1.279089442 | 0.243206080   |
| C | -18.820745280 | -1.517688568 | -1.130227304  |
| C | -19.224626882 | 0.000000000  | 0.764026350   |
| C | -19.401317388 | 1.064198869  | -0.181469442  |
| C | -19.538644197 | 2.701341867  | 1.618644459   |
| C | -19.635170027 | 2.398013060  | 0.297056766   |
| C | -18.958976448 | -0.624371786 | 3.203401063   |
| C | -19.164295458 | 0.321428886  | 2.192777823   |
| C | -18.907969174 | 2.059064147  | 3.915029541   |
| C | -19.223948615 | 1.696967486  | 2.595651359   |
| C | -18.400240093 | -1.260081575 | 5.528923608   |
| C | -18.658005675 | -0.262082187 | 4.527926055   |
| C | -17.943821080 | 1.473213395  | 6.174484666   |
| C | -18.536210367 | 1.121394950  | 4.882747370   |
| C | -17.562241537 | 2.775131131  | 6.511319299   |
| C | -17.909944079 | -0.929408057 | 6.754752968   |
| C | -16.836951332 | 0.728039165  | 8.242013273   |
| C | -17.588407293 | 0.430142325  | 7.091235846   |
| C | -16.349615673 | 2.011697507  | 8.511270532   |
| C | -16.755336261 | 3.062346814  | 7.622849607   |
| C | -15.205044590 | 4.616207213  | 8.676651541   |
| C | -16.220818672 | 4.383519330  | 7.804276371   |

|   |               |              |              |
|---|---------------|--------------|--------------|
| C | -14.919531641 | 1.387158935  | 10.511844516 |
| C | -15.341509433 | 2.298015398  | 9.536240576  |
| C | -13.504505730 | 3.763077606  | 10.251620212 |
| C | -14.677870854 | 3.569557608  | 9.506490707  |
| C | -13.377140968 | 0.682388446  | 12.328888808 |
| C | -13.782075294 | 1.610143036  | 11.308842250 |
| C | -11.639677955 | 2.831674556  | 11.673720483 |
| C | -12.976645650 | 2.773660039  | 11.084537825 |
| C | -10.652370884 | 3.706435522  | 11.212996698 |
| C | -12.194428483 | 0.819692860  | 12.991236464 |
| C | -9.925236645  | 1.807482699  | 13.107921556 |
| C | -11.250335688 | 1.843126274  | 12.634723518 |
| C | -8.920856840  | 2.632640616  | 12.588817376 |
| C | -9.307208472  | 3.591236661  | 11.594216925 |
| C | -6.977777567  | 4.021233547  | 11.037409390 |
| C | -8.294834804  | 4.321778887  | 10.885540218 |
| C | -6.992291665  | 1.735938554  | 13.975706314 |
| C | -7.496637489  | 2.458337922  | 12.887639291 |
| C | -5.188166236  | 2.682985518  | 12.084638089 |
| C | -6.539265504  | 3.051031771  | 11.998992784 |
| C | -5.081899401  | 0.846488057  | 15.308670021 |
| C | -5.618604705  | 1.468359676  | 14.129120762 |
| C | -3.341169957  | 1.333746943  | 13.127181507 |
| C | -4.709790866  | 1.838688646  | 13.087075957 |
| C | -2.537728437  | 1.249501443  | 11.989054967 |
| C | -3.750411077  | 0.574588002  | 15.433671959 |
| C | -1.503841757  | 0.315798298  | 14.397451966 |
| C | -2.836883687  | 0.766448289  | 14.340836880 |
| C | -0.685189323  | 0.260662240  | 13.263545420 |
| C | -1.265428980  | 0.658272881  | 12.013078932 |
| C | -0.584946017  | 0.347261811  | 10.788793340 |
| C | 0.685189323   | -0.260662240 | 13.263545420 |
| C | 1.503841757   | -0.315798298 | 14.397451966 |
| C | 0.584946017   | -0.347261811 | 10.788793340 |
| C | 2.537728437   | -1.249501443 | 11.989054967 |
| C | 1.265428980   | -0.658272881 | 12.013078932 |
| C | 3.341169957   | -1.333746943 | 13.127181507 |
| C | 2.836883687   | -0.766448289 | 14.340836880 |
| C | 5.081899401   | -0.846488057 | 15.308670021 |
| C | 3.750411077   | -0.574588002 | 15.433671959 |
| C | 5.188166236   | -2.682985518 | 12.084638089 |
| C | 4.709790866   | -1.838688646 | 13.087075957 |
| C | 6.992291665   | -1.735938554 | 13.975706314 |
| C | 5.618604705   | -1.468359676 | 14.129120762 |
| C | 6.977777567   | -4.021233547 | 11.037409390 |
| C | 6.539265504   | -3.051031771 | 11.998992784 |
| C | 8.920856840   | -2.632640616 | 12.588817376 |
| C | 7.496637489   | -2.458337922 | 12.887639291 |
| C | 9.925236645   | -1.807482699 | 13.107921556 |
| C | 8.294834804   | -4.321778887 | 10.885540218 |
| C | 10.652370884  | -3.706435522 | 11.212996698 |
| C | 9.307208472   | -3.591236661 | 11.594216925 |
| C | 11.639677955  | -2.831674556 | 11.673720483 |
| C | 11.250335688  | -1.843126274 | 12.634723518 |
| C | 13.377140968  | -0.682388446 | 12.328888808 |
| C | 12.194428483  | -0.819692860 | 12.991236464 |
| C | 13.504505730  | -3.763077606 | 10.251620212 |
| C | 12.976645650  | -2.773660039 | 11.084537825 |
| C | 14.919531641  | -1.387158935 | 10.511844516 |
| C | 13.782075294  | -1.610143036 | 11.308842250 |
| C | 15.205044590  | -4.616207213 | 8.676651541  |
| C | 14.677870854  | -3.569557608 | 9.506490707  |
| C | 16.349615673  | -2.011697507 | 8.511270532  |
| C | 15.341509433  | -2.298015398 | 9.536240576  |
| C | 16.836951332  | -0.728039165 | 8.242013273  |
| C | 16.220818672  | -4.383519330 | 7.804276371  |
| C | 17.562241537  | -2.775131131 | 6.511319299  |
| C | 16.755336261  | -3.062346814 | 7.622849607  |
| C | 17.943821080  | -1.473213395 | 6.174484666  |
| C | 17.588407293  | -0.430142325 | 7.091235846  |
| C | 18.400240093  | 1.260081575  | 5.528923608  |
| C | 17.909944079  | 0.929408057  | 6.754752968  |
| C | 18.907969174  | -2.059064147 | 3.915029541  |
| C | 18.536210367  | -1.121394950 | 4.882747370  |
| C | 18.958976448  | 0.624371786  | 3.203401063  |
| C | 18.658005675  | 0.262082187  | 4.527926055  |
| C | 19.538644197  | -2.701341867 | 1.618644459  |

|   |               |              |               |
|---|---------------|--------------|---------------|
| C | 19.223948615  | -1.696967486 | 2.595651359   |
| C | 19.224626882  | 0.000000000  | 0.764026350   |
| C | 19.164295458  | -0.321428886 | 2.192777823   |
| C | 19.001505386  | 1.279089442  | 0.243206080   |
| C | 19.635170027  | -2.398013060 | 0.297056766   |
| C | 19.250306140  | -0.819755435 | -1.555584703  |
| C | 19.401317388  | -1.064198869 | -0.181469442  |
| C | 18.891900712  | 0.432205042  | -2.063765712  |
| C | 18.820745280  | 1.517688568  | -1.130227304  |
| C | 18.095082635  | 3.035193184  | -2.899458585  |
| C | 18.478446670  | 2.827746516  | -1.610365211  |
| C | 18.407945284  | -0.360898873 | -4.409151152  |
| C | 18.479958640  | 0.655101013  | -3.451125374  |
| C | 17.419407845  | 2.139098612  | -5.101726593  |
| C | 18.015347942  | 1.954168860  | -3.842175921  |
| C | 17.652949619  | -1.285037775 | -6.567279333  |
| C | 17.792920859  | -0.181559836 | -5.658897986  |
| C | 16.411783056  | 1.196010979  | -7.220930639  |
| C | 17.227543145  | 1.089894658  | -6.007660321  |
| C | 15.734726500  | 2.358168421  | -7.604763504  |
| C | 16.898583775  | -1.185567994 | -7.694361330  |
| C | 15.281923906  | 0.054435469  | -9.085819989  |
| C | 16.204754247  | 0.027066236  | -8.026739279  |
| C | 14.515794372  | 1.183667682  | -9.391078377  |
| C | 14.797353796  | 2.379946890  | -8.651980599  |
| C | 13.037806740  | 3.575835614  | -9.849862235  |
| C | 14.058830328  | 3.575112937  | -8.950446225  |
| C | 12.980903998  | 0.041382963  | -11.037216605 |
| C | 13.407018008  | 1.181131378  | -10.349113992 |
| C | 11.492591974  | 2.362103531  | -11.347774963 |
| C | 12.644487732  | 2.380109898  | -10.542004169 |
| C | 11.369578410  | -1.208054757 | -12.423371765 |
| C | 11.815218833  | 0.016685525  | -11.820390620 |
| C | 9.736917702   | 1.115301400  | -12.673910580 |
| C | 11.019930898  | 1.201110089  | -11.968844233 |
| C | 8.872828083   | 2.199044473  | -12.862592882 |
| C | 10.165800294  | -1.294421098 | -13.050131616 |
| C | 7.999041370   | -0.302977375 | -13.687799245 |
| C | 9.291674955   | -0.160348422 | -13.156454973 |
| C | 7.098273369   | 0.761665410  | -13.781644311 |
| C | 7.582415523   | 2.057819395  | -13.403244144 |
| C | 5.428159115   | 3.061658709  | -13.962093541 |
| C | 6.717773300   | 3.195028203  | -13.549307675 |
| C | 5.091358799   | -0.621102957 | -14.443688156 |
| C | 5.697683842   | 0.612209033  | -14.186052778 |
| C | 3.488733599   | 1.642987999  | -14.525508119 |
| C | 4.859974968   | 1.774199688  | -14.248318070 |
| C | 3.124421342   | -2.054922001 | -14.846153675 |
| C | 3.714451334   | -0.755198536 | -14.689058217 |
| C | 2.870735452   | 0.403977897  | -14.718944343 |
| H | 0.871602534   | 2.317825932  | -14.921193999 |
| H | 1.349428454   | -3.216317909 | -15.025524945 |
| H | -0.871602534  | -2.317825932 | -14.921193999 |
| H | -3.785230030  | 2.921924408  | -14.851962342 |
| H | -1.349428454  | 3.216317909  | -15.025524945 |
| H | -2.891943400  | -2.554205678 | -14.534090416 |
| H | -5.681785960  | 1.535514772  | -14.406140242 |
| H | -4.785817296  | -3.937835504 | -14.049217511 |
| H | -7.697242954  | 1.299933152  | -14.006157665 |
| H | -7.115948678  | -4.179062784 | -13.301584876 |
| H | -9.179978957  | -3.198356453 | -12.556511893 |
| H | -12.007883935 | 2.087008203  | -12.333709348 |
| H | -9.829180147  | 2.243266048  | -13.467387787 |
| H | -10.930510717 | -3.290984528 | -11.434791938 |
| H | -13.530190041 | 0.893172132  | -10.932132703 |
| H | -12.470481023 | -4.487915381 | -10.035009877 |
| H | -15.137873979 | 0.868745829  | -9.645378944  |
| H | -14.313868711 | -4.485899755 | -8.408816927  |
| H | -15.882340356 | -3.282613436 | -7.048054882  |
| H | -18.137159396 | 2.227127438  | -6.310502381  |
| H | -16.774870749 | 2.046057854  | -8.351720390  |
| H | -17.045040945 | -3.134999326 | -5.335107376  |
| H | -18.780463101 | 1.357125316  | -4.175126414  |
| H | -17.797367948 | -4.029916271 | -3.230527699  |
| H | -19.348753730 | 1.671173667  | -2.227319969  |
| H | -18.490889632 | -3.655304860 | -0.901180314  |
| H | -18.885725658 | -2.126981406 | 0.917093780   |



|                   |               |              |               |
|-------------------|---------------|--------------|---------------|
| H                 | -19.664044811 | 3.729075195  | 1.959281215   |
| H                 | -19.840870569 | 3.179373315  | -0.434598087  |
| H                 | -18.977225051 | -1.687424944 | 2.966754357   |
| H                 | -18.909880838 | 3.120674725  | 4.158470020   |
| H                 | -18.577996441 | -2.304398371 | 5.272041185   |
| H                 | -17.802085537 | 3.600531035  | 5.842489756   |
| H                 | -17.694445011 | -1.707013683 | 7.487513690   |
| H                 | -16.548026862 | -0.104471511 | 8.882597346   |
| H                 | -14.751381041 | 5.605038865  | 8.744178447   |
| H                 | -16.593882536 | 5.184483713  | 7.166228227   |
| H                 | -15.463665075 | 0.453925313  | 10.654631773  |
| H                 | -12.987889540 | 4.716498838  | 10.146140650  |
| H                 | -14.040878461 | -0.150660663 | 12.560637010  |
| H                 | -10.892671104 | 4.428308655  | 10.433310919  |
| H                 | -11.909665457 | 0.099069278  | 13.757551712  |
| H                 | -9.661671475  | 1.025421723  | 13.819470800  |
| H                 | -6.222283803  | 4.520417680  | 10.430815864  |
| H                 | -8.612031495  | 5.068250290  | 10.157983071  |
| H                 | -7.672897514  | 1.380093906  | 14.749006093  |
| H                 | -4.495066449  | 3.098967414  | 11.353925791  |
| H                 | -5.764723746  | 0.615146930  | 16.126143941  |
| H                 | -2.941260052  | 1.554813072  | 11.024219525  |
| H                 | -3.367184565  | 0.134749007  | 16.354247466  |
| H                 | -1.137449410  | -0.084045074 | 15.343095086  |
| H                 | -1.059781430  | 0.632812078  | 9.850222563   |
| H                 | 1.137449410   | 0.084045074  | 15.343095086  |
| H                 | 1.059781430   | -0.632812078 | 9.850222563   |
| H                 | 2.941260052   | -1.554813072 | 11.024219525  |
| H                 | 5.764723746   | -0.615146930 | 16.126143941  |
| H                 | 3.367184565   | -0.134749007 | 16.354247466  |
| H                 | 4.495066449   | -3.098967414 | 11.353925791  |
| H                 | 7.672897514   | -1.380093906 | 14.749006093  |
| H                 | 6.222283803   | -4.520417680 | 10.430815864  |
| H                 | 9.661671475   | -1.025421723 | 13.819470800  |
| H                 | 8.612031495   | -5.068250290 | 10.157983071  |
| H                 | 10.892671104  | -4.428308655 | 10.433310919  |
| H                 | 14.040878461  | 0.150660663  | 12.560637010  |
| H                 | 11.909665457  | -0.099069278 | 13.757551712  |
| H                 | 12.987889540  | -4.716498838 | 10.146140650  |
| H                 | 15.463665075  | -0.453925313 | 10.654631773  |
| H                 | 14.751381041  | -5.605038865 | 8.744178447   |
| H                 | 16.548026862  | 0.104471511  | 8.882597346   |
| H                 | 16.593882536  | -5.184483713 | 7.166228227   |
| H                 | 17.802085537  | -3.600531035 | 5.842489756   |
| H                 | 18.577996441  | 2.304398371  | 5.272041185   |
| H                 | 17.694445011  | 1.707013683  | 7.487513690   |
| H                 | 18.909880838  | -3.120674725 | 4.158470020   |
| H                 | 18.977225051  | 1.687424944  | 2.966754357   |
| H                 | 19.664044811  | -3.729075195 | 1.959281215   |
| H                 | 18.885725658  | 2.126981406  | 0.917093780   |
| H                 | 19.840870569  | -3.179373315 | -0.434598087  |
| H                 | 19.348753730  | -1.671173667 | -2.227319969  |
| H                 | 17.797367948  | 4.029916271  | -3.230527699  |
| H                 | 18.490889632  | 3.655304860  | -0.901180314  |
| H                 | 18.780463101  | -1.357125316 | -4.175126414  |
| H                 | 17.045040945  | 3.134999326  | -5.335107376  |
| H                 | 18.137159396  | -2.227127438 | -6.310502381  |
| H                 | 15.882340356  | 3.282613436  | -7.048054882  |
| H                 | 16.774870749  | -2.046057854 | -8.351720390  |
| H                 | 15.137873979  | -0.868745829 | -9.645378944  |
| H                 | 12.470481023  | 4.487915381  | -10.035009877 |
| H                 | 14.313868711  | 4.485899755  | -8.408816927  |
| H                 | 13.530190041  | -0.893172132 | -10.932132703 |
| H                 | 10.930510717  | 3.290984528  | -11.434791938 |
| H                 | 12.007883935  | -2.087008203 | -12.333709348 |
| H                 | 9.179978957   | 3.198356453  | -12.556511893 |
| H                 | 9.829180147   | -2.243266048 | -13.467387787 |
| H                 | 7.697242954   | -1.299933152 | -14.006157665 |
| H                 | 4.785817296   | 3.937835504  | -14.049217511 |
| H                 | 7.115948678   | 4.179062784  | -13.301584876 |
| H                 | 5.681785960   | -1.535514772 | -14.406140242 |
| H                 | 2.891943400   | 2.554205678  | -14.534090416 |
| H                 | 3.785230030   | -2.921924408 | -14.851962342 |
| 300               |               |              |               |
| (25, 25)MCNB q=+2 |               |              |               |
| C                 | -1.434741691  | -0.142680680 | -15.151054758 |
| C                 | -0.593759824  | -1.255979419 | -15.202652487 |

|   |              |              |               |
|---|--------------|--------------|---------------|
| C | -1.630226344 | 2.321311638  | -15.235162862 |
| C | -0.809553300 | 1.148133117  | -15.207468990 |
| C | 0.593759824  | 1.255979419  | -15.202652487 |
| C | 1.434741691  | 0.142680680  | -15.151054758 |
| C | 0.809553300  | -1.148133117 | -15.207468990 |
| C | 2.988295125  | -2.245183516 | -15.130664368 |
| C | 1.630226344  | -2.321311638 | -15.235162862 |
| C | 3.582188307  | 1.416391147  | -14.789785873 |
| C | 2.889554075  | 0.221942791  | -14.993905805 |
| C | 5.039258934  | -0.947748949 | -14.699545108 |
| C | 3.656917760  | -0.990368287 | -14.960986657 |
| C | 5.597878202  | 2.699571007  | -14.189713600 |
| C | 4.957309270  | 1.455904219  | -14.493473141 |
| C | 7.121058890  | 0.299253846  | -14.004506410 |
| C | 5.718848894  | 0.241081544  | -14.427997183 |
| C | 7.956617399  | -0.815367397 | -13.914040564 |
| C | 6.889640233  | 2.748091052  | -13.754360223 |
| C | 8.964394093  | 1.622475983  | -13.041050713 |
| C | 7.676122818  | 1.561294329  | -13.605245499 |
| C | 9.757239463  | 0.489395032  | -12.849383840 |
| C | 9.248556566  | -0.752622485 | -13.358511844 |
| C | 11.253623059 | -1.921919898 | -12.605781110 |
| C | 10.055253918 | -1.931269661 | -13.257575258 |
| C | 11.558749222 | 1.616712988  | -11.482913555 |
| C | 11.029613360 | 0.492902942  | -12.120652845 |
| C | 12.905024923 | -0.791810812 | -11.167668899 |
| C | 11.753088794 | -0.737794674 | -11.974287525 |
| C | 13.141684504 | 2.719237715  | -9.946887688  |
| C | 12.694891431 | 1.556571698  | -10.653646672 |
| C | 14.457527020 | 0.239470422  | -9.463906258  |
| C | 13.379588582 | 0.311050715  | -10.455042704 |
| C | 15.145772960 | -0.932866633 | -9.144865528  |
| C | 14.136341476 | 2.649739597  | -9.015667829  |
| C | 15.683816124 | 1.327667903  | -7.623120107  |
| C | 14.785426596 | 1.412099874  | -8.704027478  |
| C | 16.280130678 | 0.127956107  | -7.229921710  |
| C | 16.033618061 | -1.020371811 | -8.056080375  |
| C | 17.366182075 | -2.422315096 | -6.570460223  |
| C | 16.648370976 | -2.269423226 | -7.719935111  |
| C | 17.281574359 | 0.989543416  | -5.073163182  |
| C | 17.052822846 | -0.035881895 | -5.994250425  |
| C | 18.107315662 | -1.571265076 | -4.380989456  |
| C | 17.537068956 | -1.341610220 | -5.646303117  |
| C | 17.963444386 | 1.820930193  | -2.850527242  |
| C | 17.837591589 | 0.756167613  | -3.800655049  |
| C | 18.583404410 | -0.828617948 | -2.017173602  |
| C | 18.213787389 | -0.572565883 | -3.411214625  |
| C | 18.861459453 | -2.099657577 | -1.512845570  |
| C | 18.308627652 | 1.581860724  | -1.551843134  |
| C | 18.712361889 | 0.000000000  | 0.300201729   |
| C | 18.562695069 | 0.254632811  | -1.076735327  |
| C | 18.858873564 | -1.290151019 | 0.814758832   |
| C | 18.984585055 | -2.357776803 | -0.136591581  |
| C | 19.035105834 | -4.007939472 | 1.655169675   |
| C | 19.148279480 | -3.700559733 | 0.332232987   |
| C | 18.627992372 | -0.672546574 | 3.260009593   |
| C | 18.778541346 | -1.617168446 | 2.241738943   |
| C | 18.436949262 | -3.356848569 | 3.952336738   |
| C | 18.768861911 | -2.998275588 | 2.634165450   |
| C | 18.119144959 | -0.035053860 | 5.594971850   |
| C | 18.312566038 | -1.032245961 | 4.584712722   |
| C | 17.516236481 | -2.743818575 | 6.220238908   |
| C | 18.116793227 | -2.411379558 | 4.927201090   |
| C | 17.066908988 | -4.023682929 | 6.548022917   |
| C | 17.622855568 | -0.352320111 | 6.826675480   |
| C | 16.486076483 | -1.960086913 | 8.317554219   |
| C | 17.232371755 | -1.691815258 | 7.152900585   |
| C | 15.936584538 | -3.216415812 | 8.583464554   |
| C | 16.262202026 | -4.276320381 | 7.672196037   |
| C | 14.652691209 | -5.753662550 | 8.745556176   |
| C | 15.658871656 | -5.562828370 | 7.846320831   |
| C | 14.607856968 | -2.554582410 | 10.640796952  |
| C | 14.944275255 | -3.464091926 | 9.634279393   |
| C | 13.055486086 | -4.847380099 | 10.392134473  |
| C | 14.212333594 | -4.698791234 | 9.606718752   |
| C | 13.175001328 | -1.813124829 | 12.527607840  |
| C | 13.487607602 | -2.735727572 | 11.476567921  |

|   |               |              |              |
|---|---------------|--------------|--------------|
| C | 11.294105087  | -3.844143349 | 11.897384994 |
| C | 12.611315240  | -3.849918964 | 11.260169548 |
| C | 10.242944050  | -4.648744841 | 11.458214350 |
| C | 12.007202641  | -1.896919660 | 13.232432956 |
| C | 9.686692653   | -2.732724068 | 13.396957053 |
| C | 10.995662676  | -2.850902963 | 12.887305206 |
| C | 8.617441480   | -3.474394616 | 12.888479053 |
| C | 8.916106950   | -4.448488099 | 11.877775818 |
| C | 6.553399591   | -4.696718082 | 11.357753156 |
| C | 7.844913331   | -5.098722840 | 11.187795859 |
| C | 6.778622000   | -2.439212969 | 14.299010430 |
| C | 7.214332677   | -3.191648480 | 13.205276046 |
| C | 4.887636036   | -3.216313115 | 12.411985564 |
| C | 6.204478793   | -3.699152736 | 12.320712262 |
| C | 4.958243908   | -1.390514183 | 15.633782849 |
| C | 5.432328635   | -2.049861871 | 14.454041821 |
| C | 3.180306434   | -1.689977404 | 13.450542144 |
| C | 4.492049578   | -2.330275207 | 13.410647545 |
| C | 2.392131720   | -1.517462604 | 12.315670680 |
| C | 3.656347493   | -0.988272422 | 15.759168329 |
| C | 1.457258484   | -0.483324538 | 14.724600603 |
| C | 2.735619572   | -1.076975669 | 14.665878047 |
| C | 0.652644504   | -0.334507502 | 13.593209293 |
| C | 1.188239048   | -0.790957869 | 12.342983026 |
| C | 0.546400381   | -0.408884730 | 11.124691821 |
| C | -0.652644504  | 0.334507502  | 13.593209293 |
| C | -1.457258484  | 0.483324538  | 14.724600603 |
| C | -0.546400381  | 0.408884730  | 11.124691821 |
| C | -2.392131720  | 1.517462604  | 12.315670680 |
| C | -1.188239048  | 0.790957869  | 12.342983026 |
| C | -3.180306434  | 1.689977404  | 13.450542144 |
| C | -2.735619572  | 1.076975669  | 14.665878047 |
| C | -4.958243908  | 1.390514183  | 15.633782849 |
| C | -3.656347493  | 0.988272422  | 15.759168329 |
| C | -4.887636036  | 3.216313115  | 12.411985564 |
| C | -4.492049578  | 2.330275207  | 13.410647545 |
| C | -6.778622000  | 2.439212969  | 14.299010430 |
| C | -5.432328635  | 2.049861871  | 14.454041821 |
| C | -6.553399591  | 4.696718082  | 11.357753156 |
| C | -6.204478793  | 3.699152736  | 12.320712262 |
| C | -8.617441480  | 3.474394616  | 12.888479053 |
| C | -7.214332677  | 3.191648480  | 13.205276046 |
| C | -9.686692653  | 2.732724068  | 13.396957053 |
| C | -7.844913331  | 5.098722840  | 11.187795859 |
| C | -10.242944050 | 4.648744841  | 11.458214350 |
| C | -8.916106950  | 4.448488099  | 11.877775818 |
| C | -11.294105087 | 3.844143349  | 11.897384994 |
| C | -10.995662676 | 2.850902963  | 12.887305206 |
| C | -13.175001328 | 1.813124829  | 12.527607840 |
| C | -12.007202641 | 1.896919660  | 13.232432956 |
| C | -13.055486086 | 4.847380099  | 10.392134473 |
| C | -12.611315240 | 3.849918964  | 11.260169548 |
| C | -14.607856968 | 2.554582410  | 10.640796952 |
| C | -13.487607602 | 2.735727572  | 11.476567921 |
| C | -14.652691209 | 5.753662550  | 8.745556176  |
| C | -14.212333594 | 4.698791234  | 9.606718752  |
| C | -15.936584538 | 3.216415812  | 8.583464554  |
| C | -14.944275255 | 3.464091926  | 9.634279393  |
| C | -16.486076483 | 1.960086913  | 8.317554219  |
| C | -15.658871656 | 5.562828370  | 7.846320831  |
| C | -17.066908988 | 4.023682929  | 6.548022917  |
| C | -16.262202026 | 4.276320381  | 7.672196037  |
| C | -17.516236481 | 2.743818575  | 6.220238908  |
| C | -17.232371755 | 1.691815258  | 7.152900585  |
| C | -18.119144959 | 0.035053860  | 5.594971850  |
| C | -17.622855568 | 0.352320111  | 6.826675480  |
| C | -18.436949262 | 3.356848569  | 3.952336738  |
| C | -18.116793227 | 2.411379558  | 4.927201090  |
| C | -18.627992372 | 0.672546574  | 3.260009593  |
| C | -18.312566038 | 1.032245961  | 4.584712722  |
| C | -19.035105834 | 4.007939472  | 1.655169675  |
| C | -18.768861911 | 2.998275588  | 2.634165450  |
| C | -18.858873564 | 1.290151019  | 0.814758832  |
| C | -18.778541346 | 1.617168446  | 2.241738943  |
| C | -18.712361889 | 0.000000000  | 0.300201729  |
| C | -19.148279480 | 3.700559733  | 0.332232987  |
| C | -18.861459453 | 2.099657577  | -1.512845570 |

|   |               |              |               |
|---|---------------|--------------|---------------|
| C | -18.984585055 | 2.357776803  | -0.136591581  |
| C | -18.583404410 | 0.828617948  | -2.017173602  |
| C | -18.562695069 | -0.254632811 | -1.076735327  |
| C | -17.963444386 | -1.820930193 | -2.850527242  |
| C | -18.308627652 | -1.581860724 | -1.551843134  |
| C | -18.107315662 | 1.571265076  | -4.380989456  |
| C | -18.213787389 | 0.572565883  | -3.411214625  |
| C | -17.281574359 | -0.989543416 | -5.073163182  |
| C | -17.837591589 | -0.756167613 | -3.800655049  |
| C | -17.366182075 | 2.422315096  | -6.570460223  |
| C | -17.537068956 | 1.341610220  | -5.646303117  |
| C | -16.280130678 | -0.127956107 | -7.229921710  |
| C | -17.052822846 | 0.035881895  | -5.994250425  |
| C | -15.683816124 | -1.327667903 | -7.623120107  |
| C | -16.648370976 | 2.269423226  | -7.719935111  |
| C | -15.145772960 | 0.932866633  | -9.144865528  |
| C | -16.033618061 | 1.020371811  | -8.056080375  |
| C | -14.457527020 | -0.239470422 | -9.463906258  |
| C | -14.785426596 | -1.412099874 | -8.704027478  |
| C | -13.141684504 | -2.719237715 | -9.946887688  |
| C | -14.136341476 | -2.649739597 | -9.015667829  |
| C | -12.905024923 | 0.791810812  | -11.167668899 |
| C | -13.379588582 | -0.311050715 | -10.455042704 |
| C | -11.558749222 | -1.616712988 | -11.482913555 |
| C | -12.694891431 | -1.556571698 | -10.653646672 |
| C | -11.253623059 | 1.921919898  | -12.605781110 |
| C | -11.753088794 | 0.737794674  | -11.974287525 |
| C | -9.757239463  | -0.489395032 | -12.849383840 |
| C | -11.029613360 | -0.492902942 | -12.120652845 |
| C | -8.964394093  | -1.622475983 | -13.041050713 |
| C | -10.055253918 | 1.931269661  | -13.257575258 |
| C | -7.956617399  | 0.815367397  | -13.914040564 |
| C | -9.248556566  | 0.752622485  | -13.358511844 |
| C | -7.121058890  | -0.299253846 | -14.004506410 |
| C | -7.676122818  | -1.561294329 | -13.605245499 |
| C | -5.597878202  | -2.699571007 | -14.189713600 |
| C | -6.889640233  | -2.748091052 | -13.754360223 |
| C | -5.039258934  | 0.947748949  | -14.699545108 |
| C | -5.718848894  | -0.241081544 | -14.427997183 |
| C | -3.582188307  | -1.416391147 | -14.789785873 |
| C | -4.957309270  | -1.455904219 | -14.493473141 |
| C | -2.988295125  | 2.245183516  | -15.130664368 |
| C | -3.656917760  | 0.990368287  | -14.960986657 |
| C | -2.889554075  | -0.221942791 | -14.993905805 |
| H | -1.015909646  | -2.259832360 | -15.215862540 |
| H | -1.141433971  | 3.290825558  | -15.326613808 |
| H | 1.015909646   | 2.259832360  | -15.215862540 |
| H | 3.589917470   | -3.153809370 | -15.138476548 |
| H | 1.141433971   | -3.290825558 | -15.326613808 |
| H | 3.047710840   | 2.365236980  | -14.800845053 |
| H | 5.568159624   | -1.899018430 | -14.659719143 |
| H | 5.016179191   | 3.616767802  | -14.279094421 |
| H | 7.607016317   | -1.789045100 | -14.253808797 |
| H | 7.342260647   | 3.704359088  | -13.493049889 |
| H | 9.322965052   | 2.600235209  | -12.722185611 |
| H | 11.841020225  | -2.836290204 | -12.526376460 |
| H | 9.679063166   | -2.853303390 | -13.700145315 |
| H | 11.059682174  | 2.580389093  | -11.572451827 |
| H | 13.397921970  | -1.757689771 | -11.069441340 |
| H | 12.640459513  | 3.666679197  | -10.142314302 |
| H | 14.967335313  | -1.843053729 | -9.715477609  |
| H | 14.431494500  | 3.540865512  | -8.462476204  |
| H | 15.863995866  | 2.238080386  | -7.053614752  |
| H | 17.794075529  | -3.391510319 | -6.315944159  |
| H | 16.500073809  | -3.115850407 | -8.389949604  |
| H | 16.973546384  | 2.008527598  | -5.302619205  |
| H | 18.417677198  | -2.589593639 | -4.153239950  |
| H | 17.735801112  | 2.835113076  | -3.177364754  |
| H | 18.924778479  | -2.952269527 | -2.186496537  |
| H | 18.355633959  | 2.404336230  | -0.838905243  |
| H | 18.640610958  | 0.850931421  | 0.975515620   |
| H | 19.113179180  | -5.042401469 | 1.987321666   |
| H | 19.319150216  | -4.487443016 | -0.401245934  |
| H | 18.705611519  | 0.390072325  | 3.035765722   |
| H | 18.388786263  | -4.419239361 | 4.184738474   |
| H | 18.350589350  | 1.000892649  | 5.349887937   |
| H | 17.250626417  | -4.855499112 | 5.870464727   |

|   |               |              |               |
|---|---------------|--------------|---------------|
| H | 17.459869690  | 0.429403186  | 7.567559258   |
| H | 16.259134687  | -1.119995144 | 8.972124516   |
| H | 14.151245176  | -6.718256767 | 8.810381114   |
| H | 15.970430249  | -6.375193082 | 7.191232751   |
| H | 15.206896700  | -1.656910763 | 10.785881436  |
| H | 12.488826524  | -5.771113281 | 10.288478762  |
| H | 13.891197512  | -1.024289512 | 12.753516084  |
| H | 10.414671703  | -5.376942907 | 10.667712632  |
| H | 11.794453982  | -1.178314472 | 14.023084056  |
| H | 9.499697950   | -1.944986899 | 14.125228806  |
| H | 5.757625664   | -5.134829943 | 10.757931194  |
| H | 8.090537735   | -5.866342638 | 10.456003579  |
| H | 7.486640119   | -2.149069487 | 15.073506261  |
| H | 4.160111184   | -3.571812443 | 11.684620190  |
| H | 5.656196530   | -1.232986610 | 16.454263548  |
| H | 2.757945851   | -1.862527399 | 11.350647501  |
| H | 3.317669830   | -0.523832903 | 16.683625706  |
| H | 1.137788543   | -0.052279500 | 15.671908101  |
| H | 0.983987902   | -0.742788753 | 10.185553803  |
| H | -1.137788543  | 0.052279500  | 15.671908101  |
| H | -0.983987902  | 0.742788753  | 10.185553803  |
| H | -2.757945851  | 1.862527399  | 11.350647501  |
| H | -5.656196530  | 1.232986610  | 16.454263548  |
| H | -3.317669830  | 0.523832903  | 16.683625706  |
| H | -4.160111184  | 3.571812443  | 11.684620190  |
| H | -7.486640119  | 2.149069487  | 15.073506261  |
| H | -5.757625664  | 5.134829943  | 10.757931194  |
| H | -9.499697950  | 1.944986899  | 14.125228806  |
| H | -8.090537735  | 5.866342638  | 10.456003579  |
| H | -10.414671703 | 5.376942907  | 10.667712632  |
| H | -13.891197512 | 1.024289512  | 12.753516084  |
| H | -11.794453982 | 1.178314472  | 14.023084056  |
| H | -12.488826524 | 5.771113281  | 10.288478762  |
| H | -15.206896700 | 1.656910763  | 10.785881436  |
| H | -14.151245176 | 6.718256767  | 8.810381114   |
| H | -16.259134687 | 1.119995144  | 8.972124516   |
| H | -15.970430249 | 6.375193082  | 7.191232751   |
| H | -17.250626417 | 4.855499112  | 5.870464727   |
| H | -18.350589350 | -1.000892649 | 5.349887937   |
| H | -17.459869690 | -0.429403186 | 7.567559258   |
| H | -18.388786263 | 4.419239361  | 4.184738474   |
| H | -18.705611519 | -0.390072325 | 3.035765722   |
| H | -19.113179180 | 5.042401469  | 1.987321666   |
| H | -18.640610958 | -0.850931421 | 0.975515620   |
| H | -19.319150216 | 4.487443016  | -0.401245934  |
| H | -18.924778479 | 2.952269527  | -2.186496537  |
| H | -17.735801112 | -2.835113076 | -3.177364754  |
| H | -18.355633959 | -2.404336230 | -0.838905243  |
| H | -18.417677198 | 2.589593639  | -4.153239950  |
| H | -16.973546384 | -2.008527598 | -5.302619205  |
| H | -17.794075529 | 3.391510319  | -6.315944159  |
| H | -15.863995866 | -2.238080386 | -7.053614752  |
| H | -16.500073809 | 3.115850407  | -8.389949604  |
| H | -14.967335313 | 1.843053729  | -9.715477609  |
| H | -12.640459513 | -3.666679197 | -10.142314302 |
| H | -14.431494500 | -3.540865512 | -8.462476204  |
| H | -13.397921970 | 1.757689771  | -11.069441340 |
| H | -11.059682174 | -2.580389093 | -11.572451827 |
| H | -11.841020225 | 2.836290204  | -12.526376460 |
| H | -9.322965052  | -2.600235209 | -12.722185611 |
| H | -9.679063166  | 2.853303390  | -13.700145315 |
| H | -7.607016317  | 1.789045100  | -14.253808797 |
| H | -5.016179191  | -3.616767802 | -14.279094421 |
| H | -7.342260647  | -3.704359088 | -13.493049889 |
| H | -5.568159624  | 1.899018430  | -14.659719143 |
| H | -3.047710840  | -2.365236980 | -14.800845053 |
| H | -3.589917470  | 3.153809370  | -15.138476548 |
